# Supplementary material
Source: ML conference proceedings conference paper supplement (https://openaccess.thecvf.com/content/WACV2023/html/Jha_GAF-Net_Improving_the_WACV_2023_paper.html)
Supplement: Supplementary file 1 [file Jha_GAF-Net_Improving_the_WACV_2023_supplemental.pdf]

# Supplementary: GAF-Net: Improving the Performance of Remote Sensing Image Fusion using Novel Global Self and Cross Attention Learning

Ankit Jha<sup>1\*</sup>

Shirsha Bose<sup>2\*</sup>

Biplab Banerjee<sup>1</sup>

<sup>1</sup>Indian Institute of Technology Bombay, India

<sup>2</sup>Technical University of Munich, Germany

{ankitjha16, shirshabosecs, getbiplab}@gmail.com

## 1. Introduction

In the supplementary paper, we provide the following analysis:

- Architecture ablation:** We present the training curves of GAF-Net on the Houston HSI-LiDAR dataset in Figure 1 and ADVANCE dataset in Figure 2 and justify the convergence of FAG-Net over the epochs.
- The analysis for the baseline architectures and self-attention block (*SAB*) on the ADVANCE dataset, as shown in Table 1. We incrementally consider all the model components (*SAB*,  $\mathcal{L}_{NRR}$  and *CAB*). It can be clearly observed that the application of these components progressively improves the performance.
- Analysis of  $Fe_1^S$  and  $Fe_2^S$ :** Tables 2 and 3 show the analysis on the depth of  $Fe_1^S$  and  $Fe_2^S$  for fixed  $Fe^{\mathcal{T}_1}$  and  $Fe^{\mathcal{T}_2}$  (ResNet-50 [3]) in GAF-Net (residual blocks with *SAB*) on both HSIs and audio-visual datasets. By considering all the multimodal dataset used in our experiments, we found that typically,  $\mathcal{S}$  with four conv. blocks for each of the streams provide consistently superior performance.
- Analysis of *CAB*:** In Table 4, we showcase the importance of cross-attention generation from the deepest layers of  $Fe^{\mathcal{T}_1}$  and  $Fe^{\mathcal{T}_2}$ , we perform the following experiments, i) GAF-Net without *CAB*, ii) cross-attention generated from the intermediate layers of  $Fe^{\mathcal{T}_1}$  and  $Fe^{\mathcal{T}_2}$ , and iii) cross-attention generated from the intermediate self-attended outputs  $\tilde{\mathcal{X}}_1$  and  $\tilde{\mathcal{X}}_2$ , respectively. We observe from Table 4 that the proposed *CAB* outperforms the remaining baselines significantly, at least by 1.8% in precision, recall and F1 values.
- Sensitivity to the amount of training samples and effect of our proposed attention modules:** In order

to analyse the agnostic property of our proposed modules, we have ablate the model without and with attention on two different backbones (DenseNet-121 and ResNet-18). We observe that the proposed attention modules help in better classification performance on both HSIs (in Figure 3) and ADVANCE datasets (in Figure 4).

- Sensitivity to the amount of training samples and effect of different self-attention modules for ADVANCE dataset:** We present the bar graphs for different ablations, i.e., Figure 5 (a) and (b) represent the sensitivity to the amount of training samples and comparison on the attention modules, respectively.

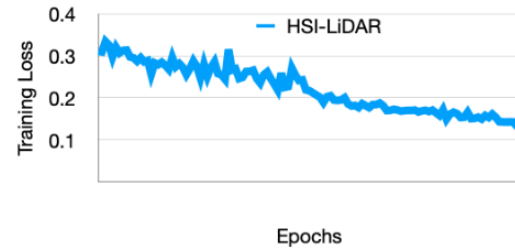

Figure 1. The training curve for GAF-Net on the Houston HSI-LiDAR datasets.

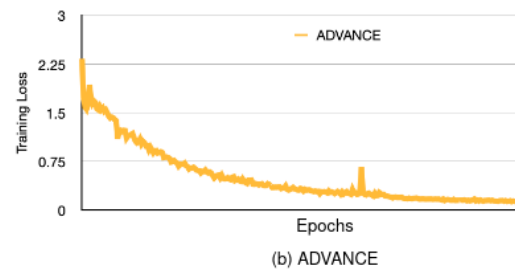

Figure 2. The training curve for GAF-Net on the ADVANCE datasets.

**Ablation on pairs of bi-modality in the Augsburg dataset:** In Table 5, we present the ablations on modality

\*equal contribution

Table 1. Ablation analysis of our proposed GAF-Net on the ADVANCE dataset. **A** and **B** are the defined baselines and analysis on *SAB*, respectively. † represents only the sub-network  $\mathcal{S}$  and without *CAB*. SA, GCA, and LCA represent spatial attention 1, global channel attention, and local channel attention, respectively. MSFRB is multi-scale feature refinement block. We highlighted the best results in **bold**.

| Methods                          |                       |            |                     |       | ADVANCE      |              |              |
|----------------------------------|-----------------------|------------|---------------------|-------|--------------|--------------|--------------|
| <b>A: Baselines</b>              |                       |            |                     |       | Precision    | Recall       | F1           |
|                                  | Layer-wise <i>SAB</i> | <i>CAB</i> | $\mathcal{L}_{NRR}$ | MSRFB |              |              |              |
| A1:                              | ✗                     | ✗          | ✗                   | ✗     | 87.63        | 88.10        | 87.86        |
| A2:                              | ✗                     | ✗          | ✓                   | ✗     | 88.93        | 89.24        | 89.08        |
| A3:                              | ✓                     | ✗          | ✗                   | ✗     | 88.76        | 89.12        | 88.93        |
| A4:                              | ✓                     | ✗          | ✓                   | ✗     | 89.18        | 89.21        | 89.19        |
| A5:                              | ✗                     | ✓          | ✗                   | ✗     | 89.04        | 88.93        | 88.98        |
| A6:                              | ✗                     | ✗          | ✗                   | ✓     | 89.17        | 88.99        | 89.07        |
| A7:                              | ✗                     | ✓          | ✓                   | ✗     | 91.11        | 90.97        | 91.04        |
| A8:                              | ✗                     | ✓          | ✓                   | ✓     | 91.95        | 92.11        | 92.03        |
| A9:                              | ✓                     | ✓          | ✗                   | ✓     | 92.43        | 92.24        | 92.33        |
| A10:                             | ✓                     | ✓          | ✓                   | ✗     | 92.82        | 92.73        | 92.77        |
| <b>B: Ablation on <i>SAB</i></b> |                       |            |                     |       |              |              |              |
| B1:                              | SA                    |            |                     |       | 91.69        | 91.56        | 91.62        |
| B2:                              | GCA                   |            |                     |       | 91.54        | 91.58        | 91.56        |
| B3:                              | LCA                   |            |                     |       | 90.02        | 89.80        | 89.91        |
| B4:                              | SA + GCA              |            |                     |       | 92.32        | 92.45        | 92.38        |
| B5:                              | SA + LCA              |            |                     |       | 92.09        | 92.14        | 92.15        |
| B6:                              | SA + GCA + LCA †      |            |                     |       | 92.46        | 92.78        | 92.61        |
| <b>GAF-Net</b>                   |                       |            |                     |       | <b>93.37</b> | <b>93.23</b> | <b>93.31</b> |

Table 2. The depth analysis for the streams of  $Fe_1^S$  and  $Fe_2^S$  in GAF-Net (residual blocks with *SAB*) on Houston 2013 HSI-LiDAR and HSI-MSI, Berlin HSI-SAR, and Augsburg HSI-SAR hyperspectral datasets.  $N$  denotes number of blocks in  $\mathcal{S}$ . We highlighted the best results in **bold**.

| N-blocks in S | Houston2013 HSI-LiDAR |              |               | Houston2013 HSI-MSI |              |               | Berlin HSI-SAR |              |               | Augsburg HSI-SAR |              |               |
|---------------|-----------------------|--------------|---------------|---------------------|--------------|---------------|----------------|--------------|---------------|------------------|--------------|---------------|
|               | OA                    | AA           | $\kappa$      | OA                  | AA           | $\kappa$      | OA             | AA           | $\kappa$      | OA               | AA           | $\kappa$      |
| 2-blocks      | 90.71                 | 93.64        | 0.8950        | 90.02               | 92.78        | 0.8893        | 77.95          | 69.93        | 0.6701        | 89.22            | 68.87        | 0.8432        |
| 4-blocks      | 91.39                 | <b>94.92</b> | 0.9018        | <b>90.64</b>        | 93.30        | <b>0.8938</b> | 78.57          | <b>70.92</b> | <b>0.6761</b> | <b>90.80</b>     | 70.10        | <b>0.8683</b> |
| 6-blocks      | <b>91.45</b>          | 94.38        | <b>0.9039</b> | 90.33               | 92.97        | 0.8911        | <b>78.70</b>   | 70.33        | 0.6750        | 89.76            | 69.10        | 0.8544        |
| 8-blocks      | 91.23                 | 94.34        | 0.8996        | 90.59               | <b>93.50</b> | 0.8925        | 78.20          | 70.52        | 0.6722        | 90.53            | <b>70.12</b> | 0.8631        |

Table 3. The depth analysis for the streams of  $Fe_1^S$  and  $Fe_2^S$  in GAF-Net (residual blocks with *SAB*) on the ADVANCE dataset.  $N$  denotes number of blocks in  $\mathcal{S}$ . We highlighted the best results in **bold**.

| N-blocks in S | ADVANCE      |              |              |
|---------------|--------------|--------------|--------------|
|               | Precision    | Recall       | F1           |
| 2-blocks      | 92.89        | 92.97        | 92.93        |
| 4-blocks      | 93.37        | 93.23        | <b>93.31</b> |
| 6-blocks      | <b>93.46</b> | 93.04        | 93.25        |
| 8-blocks      | 93.16        | <b>93.41</b> | 93.28        |

Table 4. Ablation analysis on *CAB* for the ADVANCE dataset. IL in \* and FL in \*\* denote Intermediate Layer and Final Layer, respectively. We highlighted the best results in **bold**.

| Methods                                                     | ADVANCE      |              |              |
|-------------------------------------------------------------|--------------|--------------|--------------|
| <i>CAB</i> Ablation                                         | Precision    | Recall       | F1           |
| No <i>CAB</i>                                               | 89.15        | 89.38        | 89.26        |
| <i>CAB</i> from IL of $\mathcal{T}_1$ and $\mathcal{T}_2^*$ | 91.65        | 91.59        | 91.62        |
| <i>CAB</i> from FL of $\mathcal{S}^{**}$                    | 90.89        | 90.91        | 90.90        |
| <b>GAF-Net</b>                                              | <b>93.37</b> | <b>93.23</b> | <b>93.31</b> |

combination for the hyperspectral (HSI) Augsburg dataset and choose to work with HSI and synthetic aperture radar (SAR) as the multimodal data. Our GAF-Net outperforms

Table 5. The ablation results on modality combination using GAF-Net for Augsburg dataset. + setting used in comparison with the other SOTA methods. We highlighted the best results in **bold**.

| Modality Combination For Augsburg Dataset | OA           |
|-------------------------------------------|--------------|
| Combination of HSI + SAR <sup>+</sup>     | <b>90.80</b> |
| Combination of HSI + DSM                  | 86.62        |
| Combination of DSM + SAR                  | 84.18        |

the other combinations, i.e., HSI-DSM and DSM-SAR at least by 3 %.

**Generated classification maps for Houston2013 HSI-MSI dataset:** Finally, in Figure 6, we show the classification maps between various SOTA methods and our proposed GAF-Net for Houston2013 HSI-MSI dataset, observe highly mapping of the predicted classes from GAF-Net with the ground truth.

**Series and parallel combination of SA, GCA and LCA:** Figure 7 justifies the use of SA, GCA, and LCA in *SAB* in our proposed architecture, i.e., we use the parallel combination of SA, GCA, and LCA in the *SAB* (as mentioned in

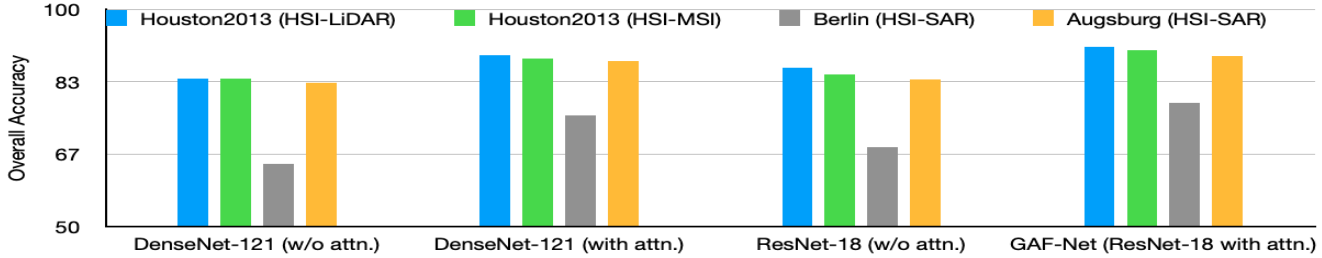

Figure 3. The performance comparison for our proposed attention modules on different backbones i.e. DenseNet-121 and ResNet-18 on Houston (HSI-LiDAR), Berlin (HSI-SAR), and Augsburg (HSI-SAR) datasets. Here, w/o attn. and with attn. denote the architecture without and with attention modules.

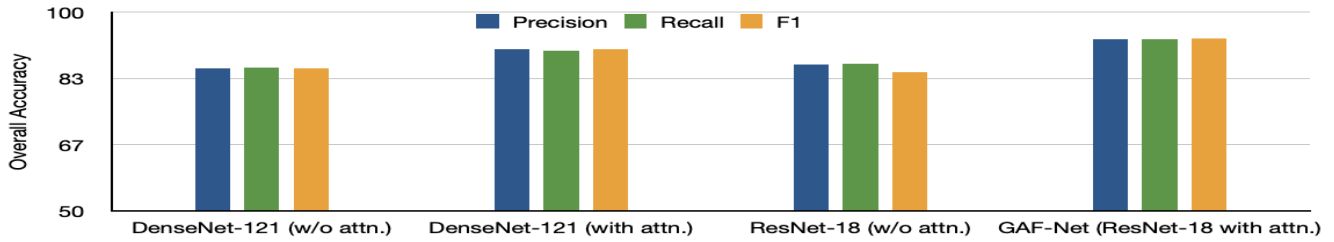

Figure 4. The performance comparison for our proposed attention modules on different backbones i.e. DenseNet-121 and ResNet-18 on the ADVANCE dataset. Here, w/o attn. and with attn. denote the architecture without and with attention modules.

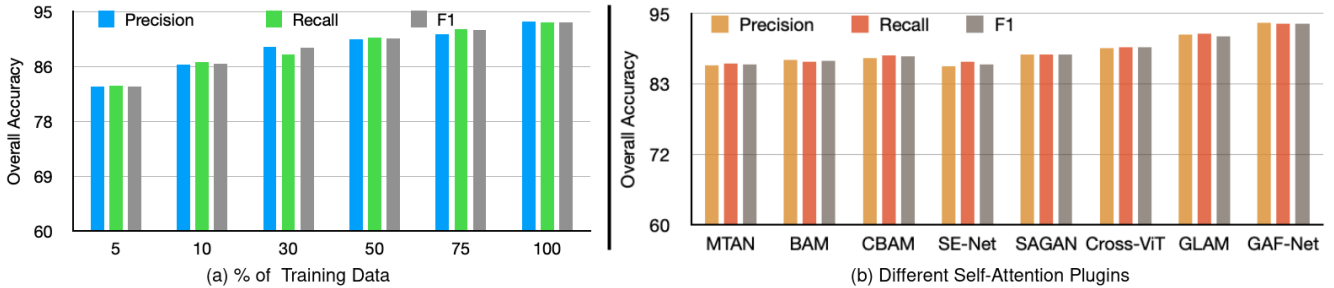

Figure 5. Analysis on (a) % of training data used in training, (b) feature extractors for  $\mathcal{S}$ , and (c) different self-attention plugins for our proposed GAF-Net architecture on ADVANCE dataset.

Figure 3(d) of main paper. We kept the position of  $CAB$  similar to which we have mentioned in Figure 2 (main paper). We present the bar graphs for all the the multimodal datasets (HSI and ADVANCE).

**Class activation map (CAM) visualization and effect of learning the auxiliary network  $\mathcal{T}_1$  and  $\mathcal{T}_2$  from pre-training and scratch:** Figure 8 shows the class activation maps (CAM) in highlighting the importance of our proposed GAF-Net. We also ablate between freeze (pre-trained) networks and training GAF-Net from scratch, shown in Figure 9.

**Computation complexity and number of trainable attention parameters:** We perform our experiments using Pytorch with 16 GB NVIDIA 3080 Ti GPU, 64 GB RAM and Intel Xeon processor. We analyse on the number of trainable parameters used by different SOTA attention modules and our GAF-Net, shown in Table 6. Here, the number of attention parameters in GAF-Net are lesser than

CBAM [7], BAM [6], SE-Net [4], ViT [2] and cross-ViT [1], but comparable to MTAN [5].

Table 6. The depth analysis for the streams of  $F e_1^{\mathcal{S}}$  and  $F e_2^{\mathcal{S}}$  in GAF-Net (residual blocks with  $SAB$ ) on the ADVANCE dataset.  $N$  denotes number of blocks in  $\mathcal{S}$ . We highlighted the best results in **bold**.

| Attention Module          | CBAM | BAM  | SE-Net | MTAN | ViT  | Cross-ViT | GAF-Net |
|---------------------------|------|------|--------|------|------|-----------|---------|
| Number of in Millions (M) | 1.18 | 2.20 | 4.70   | 0.59 | 7.08 | 3.74      | 0.61    |

## References

- [1] Chun-Fu Chen, Quanfu Fan, and Rameswar Panda. Crossvit: Cross-attention multi-scale vision transformer for image classification. *CoRR*, abs/2103.14899, 2021.
- [2] Alexey Dosovitskiy, Lucas Beyer, Alexander Kolesnikov, Dirk Weissenborn, Xiaohua Zhai, Thomas Unterthiner,

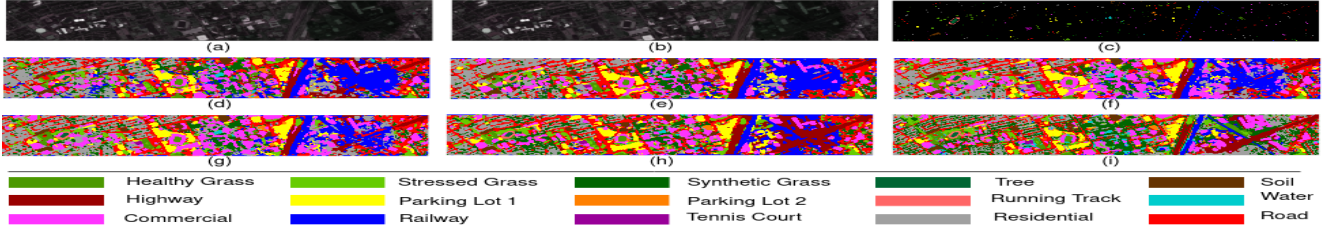

Figure 6. The classification maps for Houston2013 HSI-MSI-dataset. (a) HSI's true colour composite (RGB Bands-43, 22, 36), (b) MSI's true colour composite (RGB Bands-2,1,4), and (c) Ground-truth. From (c) to (i) represent classification maps for different methods/algorithms. Specifically, (d)End-Net, (e)Co-CNN, (f) CCR-Net, (g) FusAtNet, (h)  $\mathcal{T}_1 + \mathcal{T}_2$ , (i) GAF-Net

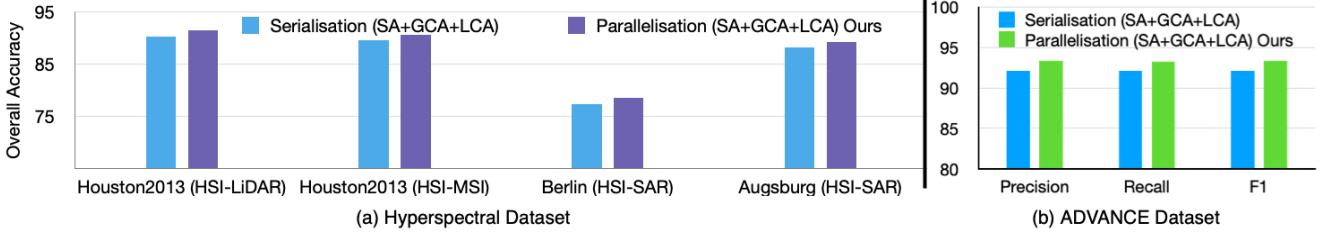

Figure 7. Analysis on series and parallel combinations of SA, GCA and LCA in  $SAB$  for (a) Hyperspectral Datasets and (b) ADVANCE dataset. We kept  $CAB$  to be at the similar position as mentioned for GAF-Net (main paper).

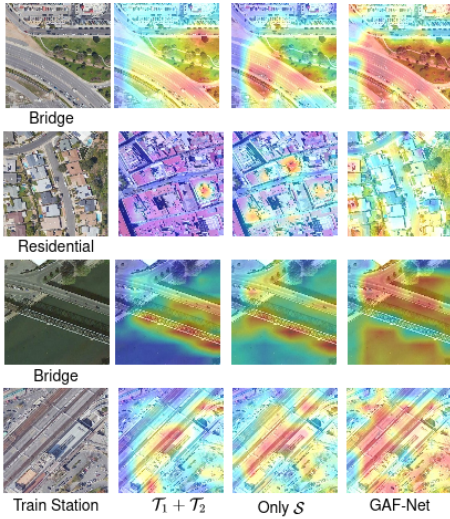

Figure 8. The generated class activation map from the fusion modality-specific network  $\mathcal{T}_1$  and  $\mathcal{T}_2$ , i.e.,  $\mathcal{T}_1 + \mathcal{T}_2$ , sub-network  $S$  (only  $S$  represents  $S$  with  $SAB$  no  $CAB$ ) and GAF-Net on ADVANCE dataset.

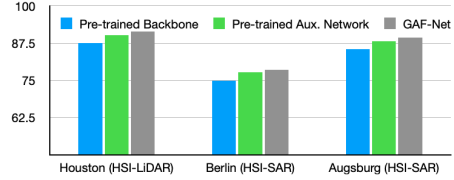

Figure 9. The performance comparison of GAF-Net with pre-trained backbone, pre-trained modality on Houston (HSI-LiDAR), Berlin (HSI-SAR), and Augsburg (HSI-SAR) datasets. Here, the pre-trained backbone and modality represent initializing the network with pre-trained weights on ImageNet and the datasets used in our experiments.

Mostafa Dehghani, Matthias Minderer, Georg Heigold, Sylvain Gelly, Jakob Uszkoreit, and Neil Houlsby. An image is worth 16x16 words: Transformers for image recognition at scale. *CoRR*, abs/2010.11929, 2020.

- [3] Kaiming He, Xiangyu Zhang, Shaoqing Ren, and Jian Sun. Deep residual learning for image recognition. *CoRR*, abs/1512.03385, 2015.
- [4] Jie Hu, Li Shen, and Gang Sun. Squeeze-and-excitation networks. In *2018 IEEE/CVF Conference on Computer Vision and Pattern Recognition*, pages 7132–7141, 2018.

- [5] Shikun Liu, Edward Johns, and Andrew J. Davison. End-to-end multi-task learning with attention. *CoRR*, abs/1803.10704, 2018.
- [6] Jongchan Park, Sanghyun Woo, Joon-Young Lee, and In So Kweon. BAM: bottleneck attention module. *CoRR*, abs/1807.06514, 2018.
- [7] Sanghyun Woo, Jongchan Park, Joon-Young Lee, and In So Kweon. Cbam: Convolutional block attention module. In *Proceedings of the European conference on computer vision (ECCV)*, pages 3–19, 2018.
